# Supplementary material for: Influence of Commonly Used Endodontic Irrigants on the Setting Time and Metal Composition of Various Base Endodontic Sealers
Source: MDPI journal article supplement (doi:10.3390/polym14010027), 2021-12-22

Supplementary documents

**Figure S1:** Mandibular premolar specimens mounted on wax molds followed by instrumentation using Protaper Gold rotary system (Dentsply Maillefer, Ballaigues, Switzerland) (1A) and filling the canal with respective sealers using a motorized lentulospiral (Dentsply Maillefer, Ballaigues, Switzerland) (1B).

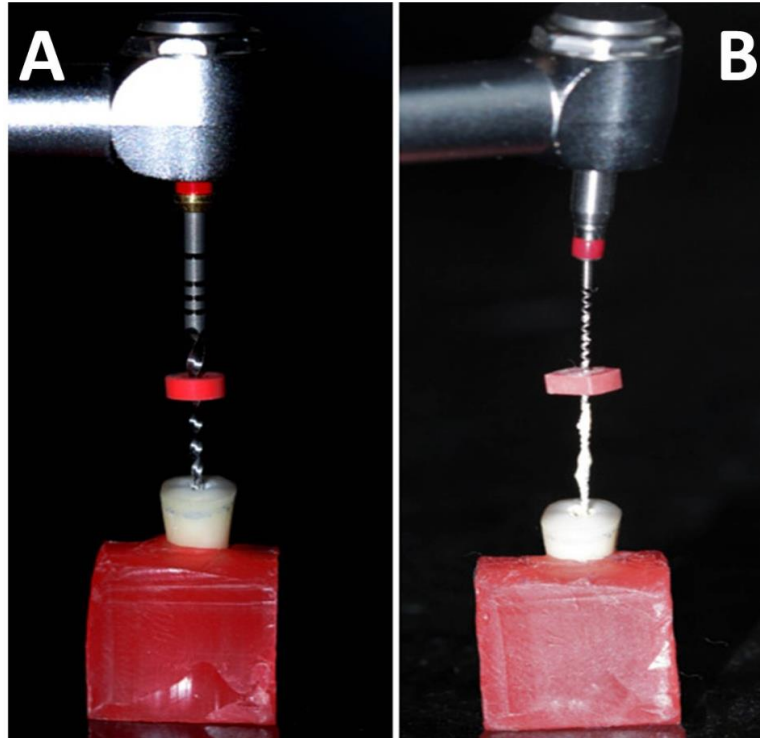

**Figure S2:** Cross section of the decoronated tooth with sealer filled till the orifice using a size 25 motorized lentulospiral (Dentsply Maillefer, Ballaigues, Switzerland)

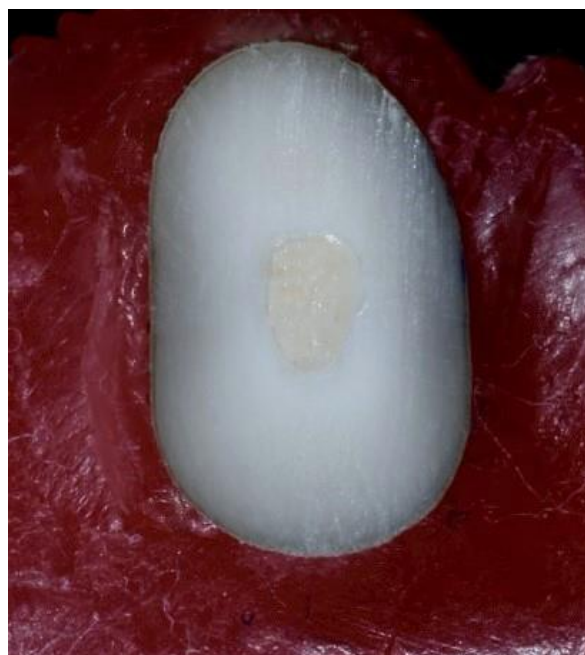

**Figure S3:** Analysis of heavy metal elements in the sealer conducted using inductively coupled plasma mass spectrometry (ICP-MS) (Agilent 7700x, Santa Clara, CA, USA)

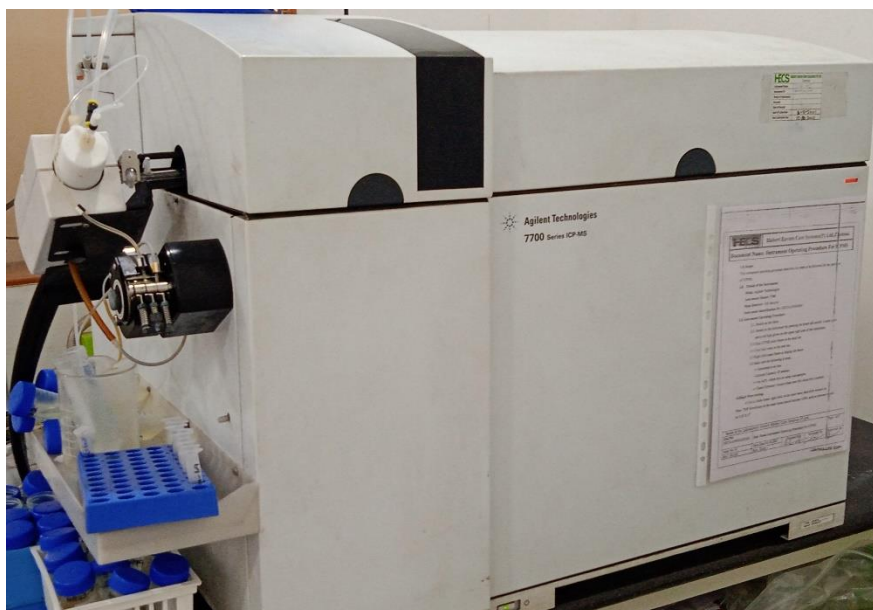

Supplement: s1 [file s1]
